# Supplementary material for: Inhibition of G Protein–Coupled Receptor Kinase 2 Promotes Unbiased Downregulation of IGF1 Receptor and Restrains Malignant Cell Growth
Source: Oxford University Press journal article supplement (doi:10.1158/0008-5472.can-20-1662), 2020-11-06
Supplement: 00085472can201662-sup-243558_2_supp_6684480_qjx6jk.docx [file 00085472can201662-sup-243558_2_supp_6684480_qjx6jk.docx]

| Table S1. Antibodies used in this study. | | | |
| --- | --- | --- | --- |
| **Target** | Source (company, city, state) | Catalog# | Application (Western blot, WB, Immunoprecipitation IP, Immunohistochemistry IHC); dilution |
| IGF1R | Cell signaling Technology, Danvers, USA | #3027 | WB, primary; 1:2000 |
| GAPDH (FL-335) | SantaCruz, Dallas, USA | SC-25778 | WB, primary, 1:2000 |
| pIGF1R | Cell signaling Technology | #3021 | WB, primary, 1:2000 |
| pAkt | Cell signaling Technology | #4060 | WB, primary, 1:2000 |
| Akt | Cell signaling Technology | #9272 | WB, primary, 1:2000 |
| pERK1/2 | Cell signaling Technology | #9101 | WB, primary, 1:2000 |
| ERK1/2 | Cell signaling Technology | #9102 | WB, primary, 1:2000 |
| SERCA2 | Cell signaling Technology | #9580 | WB, primary, 1:2000 |
| Lamin A (H-102) | SantaCruz | SC-20680 | WB, primary, 1:200 |
| IGF1R H-60 | SantaCruz | SC-9038 | IP |
| IGF1R C-20 | SantaCruz | SC-713 | IP |
| Ubiquitin (P4D1) | SantaCruz | SC-8017 | WB, primary, 1:200 |
| FLAG, rabbit | Sigma-Aldrich,  St. Louis, USA | F7425 | WB, primary, 1:1000 |
| IGF1R (D23H3) | Cell signaling Technology | #9750 | IHC, primary, 1:100 |
| GRK2 | SantaCruz | Sc-562 | WB, primary, 1:200 |
| GRK6 | SantaCruz | Sc-566 | WB, primary, 1:200 |
| Beta arrestin1/2 | Cell signaling Technology | #4674 | WB, primary, 1:2000 |
| Insulin receptor (D3U7I) | Cell signaling Technology | #74118 | WB, primary, 1:2000 |
| Anti-rabbit-HRP | Thermofisher, Waltham, USA | #31460 | WB, secondary, 1:2000 |
| Anti-mouse HRP | Thermofisher | #31430 | WB, secondary, 1:2000 |
| Anti-rabbit-IRDye800CW | LI-COR, Lincoln, USA | #926-32211 | WB, secondary, 1:7000 |
| Anti-mouse-IRDye680RD | LI-COR | #926-68070 | WB, secondary, 1:7000 |
